# Supplementary material for: Assessment of the relationship between genome information and sociality across mammal species
Source: Research Square preprint supplement (doi:10.21203/rs.3.rs-5806422/v1), 2025-10-09
Supplement: Supplementary file 1 [file ae01c22b18b77abab462d55a.docx]

**Table A1**. Species names, data sources, data information and entry specifications

| **Common name** | **Scientific name** | **Taxon ID** | **Ensembl Assembly** | **Genebuild Method** | **Dataset ensembl** | **Lifehistory information and social classification** |
| --- | --- | --- | --- | --- | --- | --- |
| Alpine marmot | *Marmota marmota marmota* | 9994 | marMar2.1 | Full genebuild | mmmarmota_gene_ensembl | Published data from Zhu et al., 2023 |
| American black bear | *Ursus americanus* | 9643 | ASM334442v1 | Full genebuild | uamericanus_gene_ensembl | Published data from Zhu et al., 2023 |
| American mink | *Neovison vison* | 452646 | NNQGG.v01 | Full genebuild | nvison_gene_ensembl | Published data from Zhu et al., 2023 |
| Arctic ground squirrel | *Urocitellus parryii* | 9999 | ASM342692v1 | Full genebuild | uparryii_gene_ensembl | Published data from Zhu et al., 2023 |
| Armadillo | *Dasypus novemcinctus* | 9361 | Dasnov3.0 | Mixed strategy build | dnovemcinctus_gene_ensembl | Published data from Zhu et al., 2023 |
| Beluga whale | *Delphinapterus leucas* | 9749 | ASM228892v3 | Full genebuild | dleucas_gene_ensembl | Published data from Zhu et al., 2023 |
| Blue whale | *Balaenoptera musculus* | 9771 | mBalMus1.v2 | Full genebuild | bmusculus_gene_ensembl | Published data from Zhu et al., 2023 |
| Bolivian squirrel monkey | *Saimiri boliviensis boliviensis* | 39432 | SaiBol1.0 | Full genebuild | sbboliviensis_gene_ensembl | Published data from Zhu et al., 2023 |
| Bonobo | *Pan paniscus* | 9597 | panpan1.1 | Full genebuild | ppaniscus_gene_ensembl | Published data from Zhu et al., 2023 |
| Bushbaby | *Otolemur garnettii* | 30611 | OtoGar3 | Full genebuild | ogarnettii_gene_ensembl | Published data from Zhu et al., 2023 |
| Cat | *Felis catus* | 9685 | Felis_catus_9.0 | Full genebuild | fcatus_gene_ensembl | Published data from Zhu et al., 2023 |
| Chacoan peccary | *Catagonus wagneri* | 51154 | CatWag_v2_BIUU_UCD | Full genebuild | cwagneri_gene_ensembl | Published data from Zhu et al., 2023 |
| Chimpanzee | *Pan troglodytes* | 9598 | Pan_tro_3.0 | Full genebuild | ptroglodytes_gene_ensembl | Published data from Zhu et al., 2023 |
| Cow | *Bos taurus* | 9913 | ARS-UCD1.2 | Full genebuild | btaurus_gene_ensembl | Published data from Zhu et al., 2023 |
| Crab-eating macaque | *Macaca fascicularis* | 9541 | Macaca_fascicularis_6.0 | Full genebuild | mfascicularis_gene_ensembl | Published data from Zhu et al., 2023 |
| Degu | *Octodon degus* | 10160 | OctDeg1.0 | Full genebuild | odegus_gene_ensembl | Published data from Zhu et al., 2023 |
| Dog | *Canis lupus familiaris* | 9615 | ROS_Cfam_1.0 | Full genebuild | cldingo_gene_ensembl | Published data from Zhu et al., 2023 |
| Dolphin | *Tursiops truncatus* | 9739 | turTru1 | Projection build | ttruncatus_gene_ensembl | Published data from Zhu et al., 2023 |
| Domestic yak | *Bos grunniens* | 30521 | LU_Bosgru_v3.0 | Full genebuild | bgrunniens_gene_ensembl | Published data from Zhu et al., 2023 |
| Donkey | *Equus asinus* | 9793 | ASM1607732v2 | Full genebuild | eaasinus_gene_ensembl | Published data from Zhu et al., 2023 |
| Drill | *Mandrillus leucophaeus* | 9568 | Mleu.le_1.0 | Full genebuild | mleucophaeus_gene_ensembl | Published data from Zhu et al., 2023 |
| Elephant | *Loxodonta africana* | 9785 | Loxafr3.0 | Full genebuild | lafricana_gene_ensembl | Published data from Zhu et al., 2023 |
| Eurasian red squirrel | *Sciurus vulgaris* | 55149 | mSciVul1.1 | Full genebuild | svulgaris_gene_ensembl | Published data from Zhu et al., 2023 |
| Ferret | *Mustela putorius furo* | 9669 | MusPutFur1.0 | Mixed strategy build | mpfuro_gene_ensembl | Published data from Zhu et al., 2023 |
| Giant panda | *Ailuropoda melanoleuca* | 9646 | ASM200744v2 | Full genebuild | amelanoleuca_gene_ensembl | Published data from Zhu et al., 2023 |
| Gibbon | *Nomascus leucogenys* | 61853 | Nleu_3.0 | Full genebuild | nleucogenys_gene_ensembl | Published data from Zhu et al., 2023 |
| Goat | *Capra hircus* | 9925 | ARS1 | Full genebuild | chircus_gene_ensembl | Published data from Zhu et al., 2023 |
| Golden Hamster | *Mesocricetus auratus* | 10036 | MesAur1.0 | Full genebuild | mauratus_gene_ensembl | Published data from Zhu et al., 2023 |
| Golden snub-nosed monkey | *Rhinopithecus roxellana* | 61622 | Rrox_v1 | Full genebuild | rroxellana_gene_ensembl | Published data from Zhu et al., 2023 |
| Gorilla | *Gorilla gorilla gorilla* | 9595 | gorGor4 | Full genebuild | ggorilla_gene_ensembl | Published data from Zhu et al., 2023 |
| Greater bamboo lemur | *Prolemur simus* | 1328070 | Prosim_1.0 | Full genebuild | psimus_gene_ensembl | Published data from Zhu et al., 2023 |
| Greater horseshoe bat | *Rhinolophus ferrumequinum* | 59479 | mRhiFer1_v1.p | Full genebuild | rferrumequinum_gene_ensembl | Published data from Zhu et al., 2023 |
| Guinea Pig | *Cavia porcellus* | 10141 | Cavpor3.0 | Full genebuild | cporcellus_gene_ensembl | Published data from Zhu et al., 2023 |
| Hedgehog | *Erinaceus europaeus* | 9365 | eriEur1 | Projection build | eeuropaeus_gene_ensembl | Published data from Zhu et al., 2023 |
| Horse | *Equus caballus* | 9796 | EquCab3.0 | Full genebuild | ecaballus_gene_ensembl | Published data from Zhu et al., 2023 |
| Human | *Homo sapiens* | 9606 | GRCh38.p13 | Full genebuild | hsapiens_gene_ensembl | Published data from Zhu et al., 2023 |
| Hyrax | *Procavia capensis* | 9813 | proCap1 | Projection build | pcapensis_gene_ensembl | Published data from Zhu et al., 2023 |
| Kangaroo rat | *Dipodomys ordii* | 10020 | Dord_2.0 | Full genebuild | dordii_gene_ensembl | Published data from Zhu et al., 2023 |
| Leopard | *Panthera pardus* | 9691 | PanPar1.0 | Full genebuild | ppardus_gene_ensembl | Published data from Zhu et al., 2023 |
| Lesser Egyptian jerboa | *Jaculus jaculus* | 51337 | JacJac1.0 | Full genebuild | jjaculus_gene_ensembl | Published data from Zhu et al., 2023 |
| Lesser hedgehog tenrec | *Echinops telfairi* | 9371 | TENREC | Projection build | etelfairi_gene_ensembl | Published data from Zhu et al., 2023 |
| Lion | *Panthera leo* | 9689 | PanLeo1.0 | Full genebuild | pleo_gene_ensembl | Published data from Zhu et al., 2023 |
| Long-tailed chinchilla | *Chinchilla lanigera* | 34839 | ChiLan1.0 | Full genebuild | clanigera_gene_ensembl | Published data from Zhu et al., 2023 |
| Macaque | *Macaca mulatta* | 9544 | Mmul_10 | Full genebuild | mmulatta_gene_ensembl | Published data from Zhu et al., 2023 |
| Megabat | *Pteropus vampyrus* | 132908 | pteVam1 | Projection build | pvampyrus_gene_ensembl | Published data from Zhu et al., 2023 |
| Microbat | *Myotis lucifugus* | 59463 | Myoluc2.0 | Full genebuild | mlucifugus_gene_ensembl | Published data from Zhu et al., 2023 |
| Mouse Lemur | *Microcebus murinus* | 30608 | Mmur_3.0 | Full genebuild | mmurinus_gene_ensembl | Published data from Zhu et al., 2023 |
| Naked mole-rat female | *Heterocephalus glaber* | 10181 | HetGla_female_1.0 | Full genebuild | hgfemale_gene_ensembl | Published data from Zhu et al., 2023 |
| Narwhal | *Monodon monoceros* | 40151 | NGI_Narwhal_1 | Full genebuild | mmonoceros_gene_ensembl | Published data from Zhu et al., 2023 |
| Northern American deer mouse | *Peromyscus maniculatus bairdii* | 230844 | HU_Pman_2.1 | Full genebuild | pmbairdii_gene_ensembl | Published data from Zhu et al., 2023 |
| Olive baboon | *Papio anubis* | 9555 | Panubis1.0 | Full genebuild | panubis_gene_ensembl | Published data from Zhu et al., 2023 |
| Opossum | *Monodelphis domestica* | 13616 | ASM229v1 | Full genebuild | mdomestica_gene_ensembl | Published data from Zhu et al., 2023 |
| Pig | *Sus scrofa* | 9823 | Sscrofa11.1 | Full genebuild | sscrofa_gene_ensembl | Published data from Zhu et al., 2023 |
| Pig-tailed macaque | *Macaca nemestrina* | 9545 | Mnem_1.0 | Full genebuild | mnemestrina_gene_ensembl | Published data from Zhu et al., 2023 |
| Pika | *Ochotona princeps* | 9978 | OchPri2.0-Ens | Projection build | oprinceps_gene_ensembl | Published data from Zhu et al., 2023 |
| Platypus | *Ornithorhynchus anatinus* | 9258 | mOrnAna1.p.v1 | Full genebuild | oanatinus_gene_ensembl | Published data from Zhu et al., 2023 |
| Polar bear | *Ursus maritimus* | 29073 | UrsMar_1.0 | Full genebuild | umaritimus_gene_ensembl | Published data from Zhu et al., 2023 |
| Prairie vole | *Microtus ochrogaster* | 79684 | MicOch1.0 | Full genebuild | mochrogaster_gene_ensembl | Published data from Zhu et al., 2023 |
| Rabbit | *Oryctolagus cuniculus* | 9986 | OryCun2.0 | Full genebuild | ocuniculus_gene_ensembl | Published data from Zhu et al., 2023 |
| Rat | *Rattus norvegicus* | 10116 | mRatBN7.2 | Full genebuild | rnorvegicus_gene_ensembl | Published data from Zhu et al., 2023 |
| Red fox | *Vulpes vulpes* | 9627 | VulVul2.2 | Full genebuild | vvulpes_gene_ensembl | Published data from Zhu et al., 2023 |
| Sheep | *Ovis aries* | 9940 | Oar_rambouillet_v1.0 | Full genebuild | oaries_gene_ensembl | Published data from Zhu et al., 2023 |
| Shrew | *Sorex araneus* | 42254 | sorAra1 | Projection build | saraneus_gene_ensembl | Published data from Zhu et al., 2023 |
| Sloth | *Choloepus hoffmanni* | 9358 | choHof1 | Projection build | choffmanni_gene_ensembl | Published data from Zhu et al., 2023 |
| Sooty mangabey | *Cercocebus atys* | 9531 | Caty_1.0 | Full genebuild | catys_gene_ensembl | Published data from Zhu et al., 2023 |
| Squirrel | *Ictidomys tridecemlineatus* | 43179 | SpeTri2.0 | Full genebuild | itridecemlineatus_gene_ensembl | Published data from Zhu et al., 2023 |
| Sumatran orangutan | *Pongo abelii* | 9601 | Susie_PABv2 | Full genebuild | pabelii_gene_ensembl | Published data from Zhu et al., 2023 |
| Tasmanian devil | *Sarcophilus harrisii* | 9305 | mSarHar1.11 | Full genebuild | sharrisii_gene_ensembl | Published data from Zhu et al., 2023 |
| Tiger | *Panthera tigris altaica* | 74533 | PanTig1.0 | Full genebuild | ptaltaica_gene_ensembl | Published data from Zhu et al., 2023 |
| Tree Shrew | *Tupaia belangeri* | 37347 | tupBel1 | Projection build | tbelangeri_gene_ensembl | Published data from Zhu et al., 2023 |
| White-tufted-ear marmoset | *Callithrix jacchus* | 9483 | mCalJac1.pat.X | Full genebuild | cjacchus_gene_ensembl | Published data from Zhu et al., 2023 |
